# Supplementary material
Source: Springer Nature journal article supplement (https://www.springermedizin.de/resource/supplementary/12958_2013_1116_MOESM1_ESM.pdf/9566824)

**A**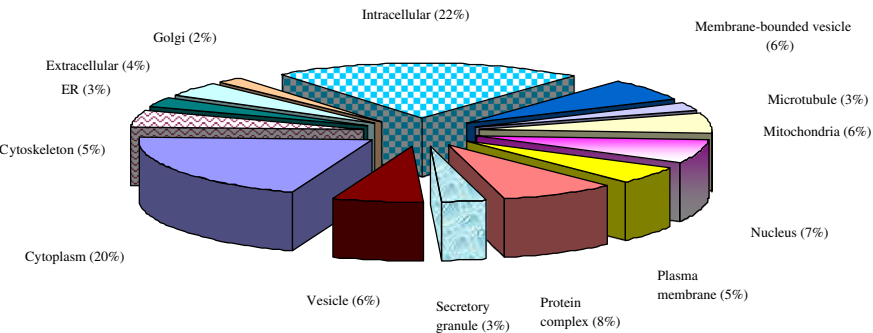**B**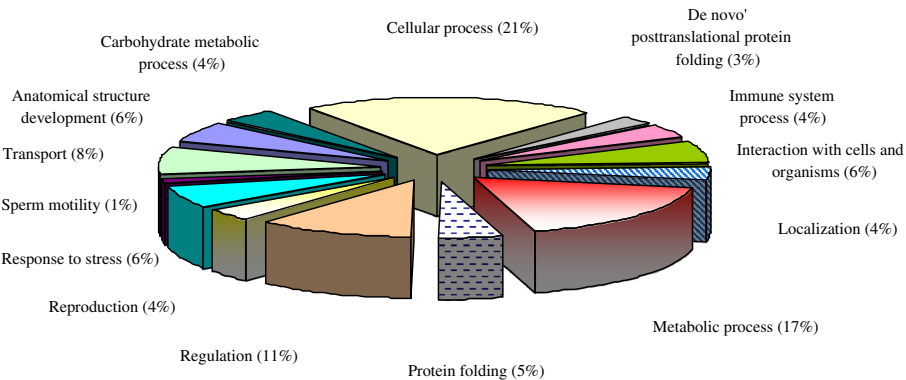

Supplement: MOESM1 [file 9566824]
